# Supplementary material for: Shape controlled synthesis of tadpole-like and heliotrope seed-like AgInS2 nanocrystals
Source: Royal Society of Chemistry journal article supplement (doi:10.1039/c0ce00025f), 2010-01-01
Supplement: c0ce00025f.pdf [file c0ce00025f.pdf]

**Supporting Information:**

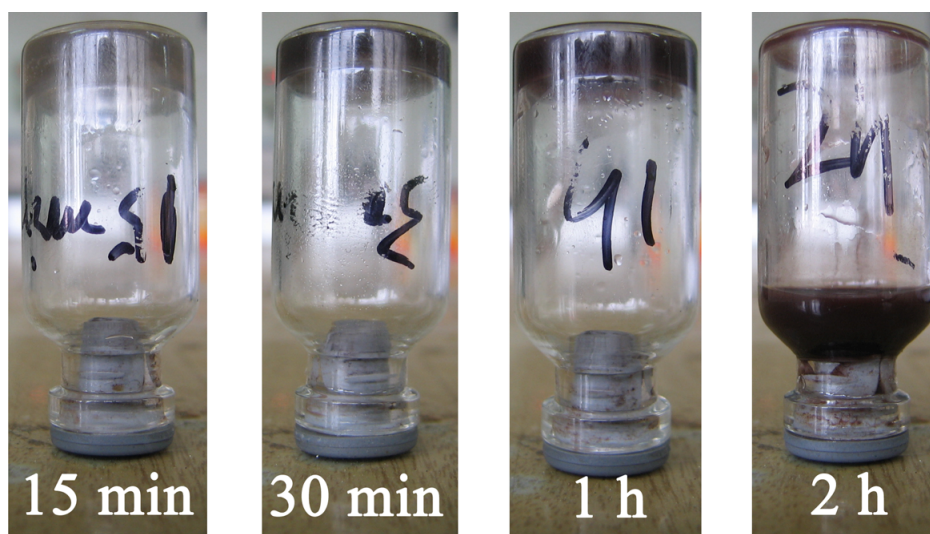

**Figure S1.** Photographs of sample aliquots extracted from AgInS<sub>2</sub> reaction solution at different time.

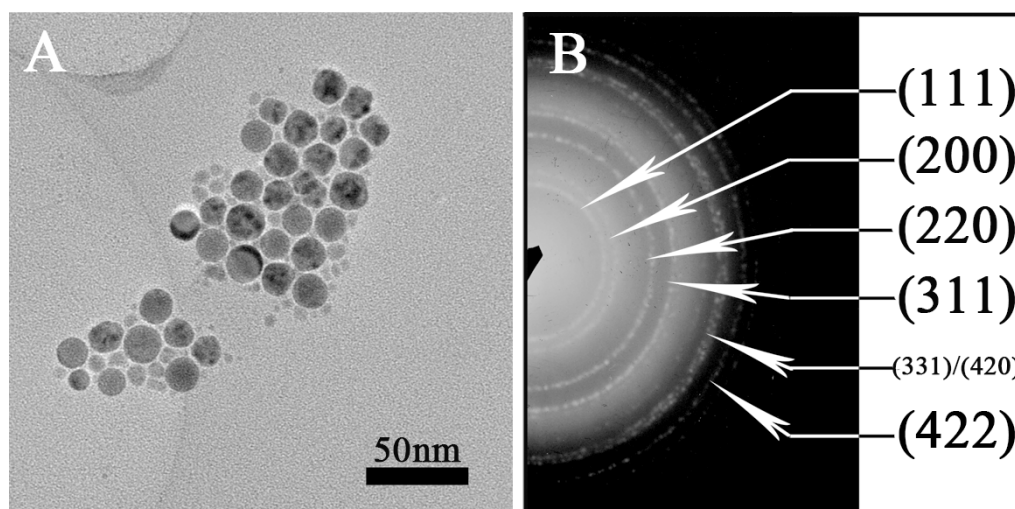

**Figure S2.** TEM image and SAED of Ag nanocrystals prepared in control experiment without the participation of In(acac)<sub>3</sub>.

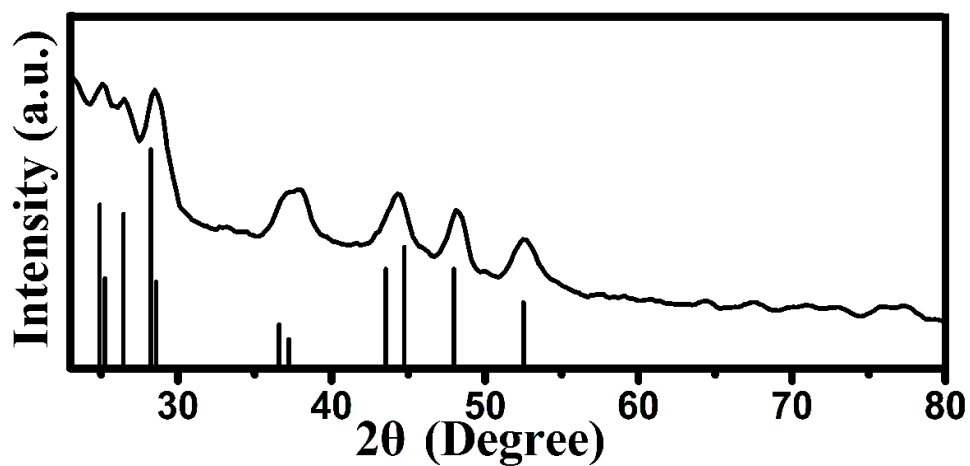

**Figure S3.** XRD pattern of heliotrope seed-like  $\text{AgInS}_2$  nanocrystals.

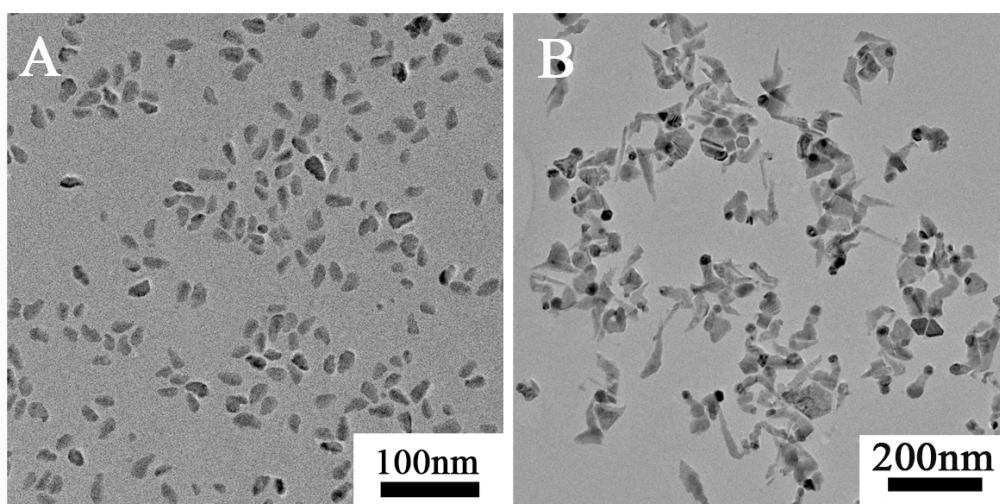

**Figure S4.** (A) Heliotrope seed-like  $\text{AgInS}_2$  nanocrystals synthesized by using 2.5 mL DDT and 2.5 mL OAM as high boiling point solvent. (B) Tadpole-like  $\text{AgInS}_2$  nanocrystals synthesized by using 2.5 mL DDT and 2.5 mL ODE as high boiling point solvent.
